# Supplementary material
Source: publisher figshare collection journal article supplement (https://acs.figshare.com/ndownloader/files/5011351)
Supplement: Supplementary file 1 [file 5011351]

**New Reactive Extraction Based Reclaiming Technique for Amines Used in Carbon Dioxide  
Capture Process from Industrial Flue Gases**

Phattara Akkarachalanont<sup>b</sup>, Chintana Saiwan<sup>b</sup>, Teeradet Supap<sup>c</sup>, Raphael Idem<sup>c,\*</sup>

Paitoon Tontiwachwuthikul<sup>c</sup>

*<sup>b</sup>Petroleum and Petrochemical College (PPC), Chulalongkorn University, Bangkok,  
Thailand, 10330*

*<sup>c</sup>Clean Energy Technologies Research Institute (CETRI), University of Regina, Regina, SK,  
Canada, S4S 0A2*

### Supporting Information

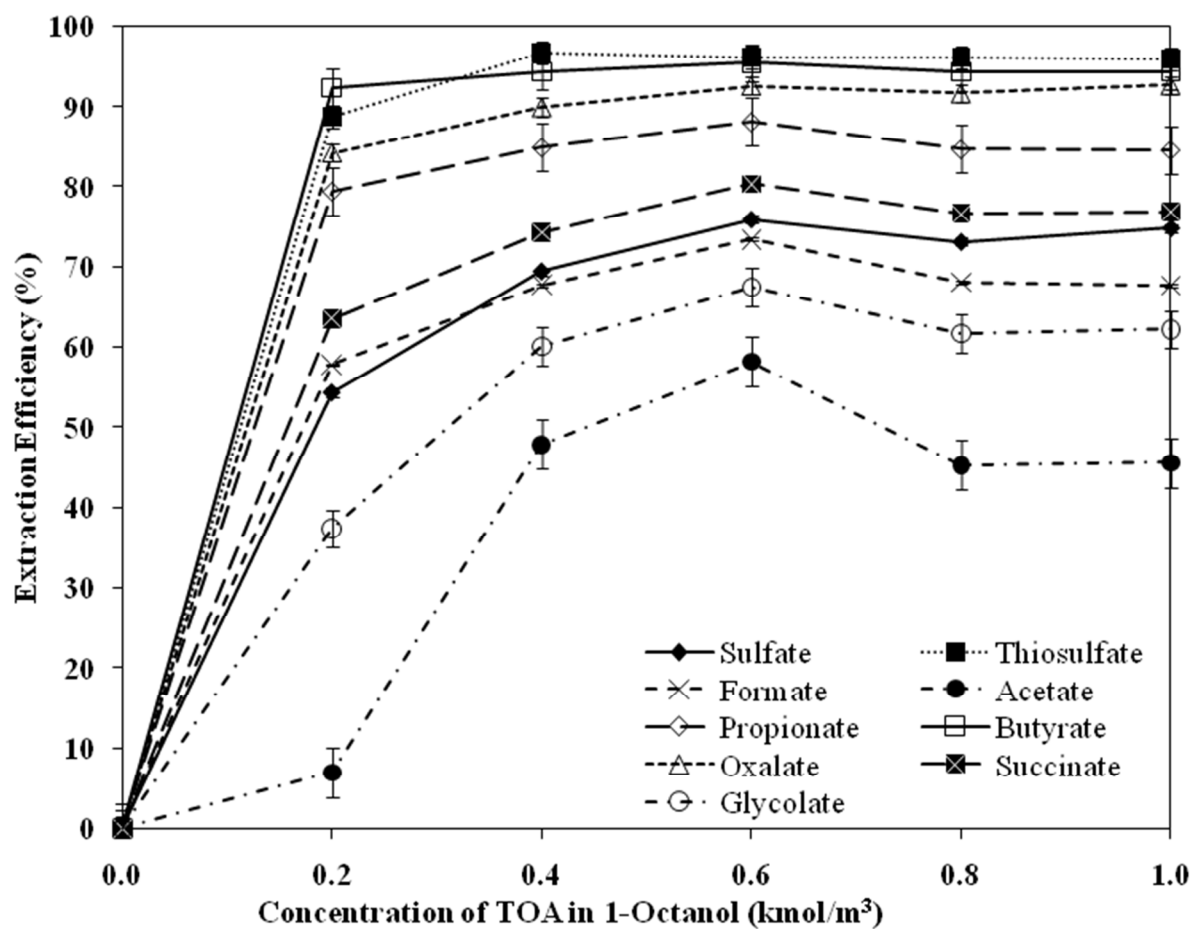

**Figure S1.** Effect of TOA concentration in 1-octanol on extraction of HSS in water (room temperature, 10 min mixing time, 1 to 1 phase ratio)

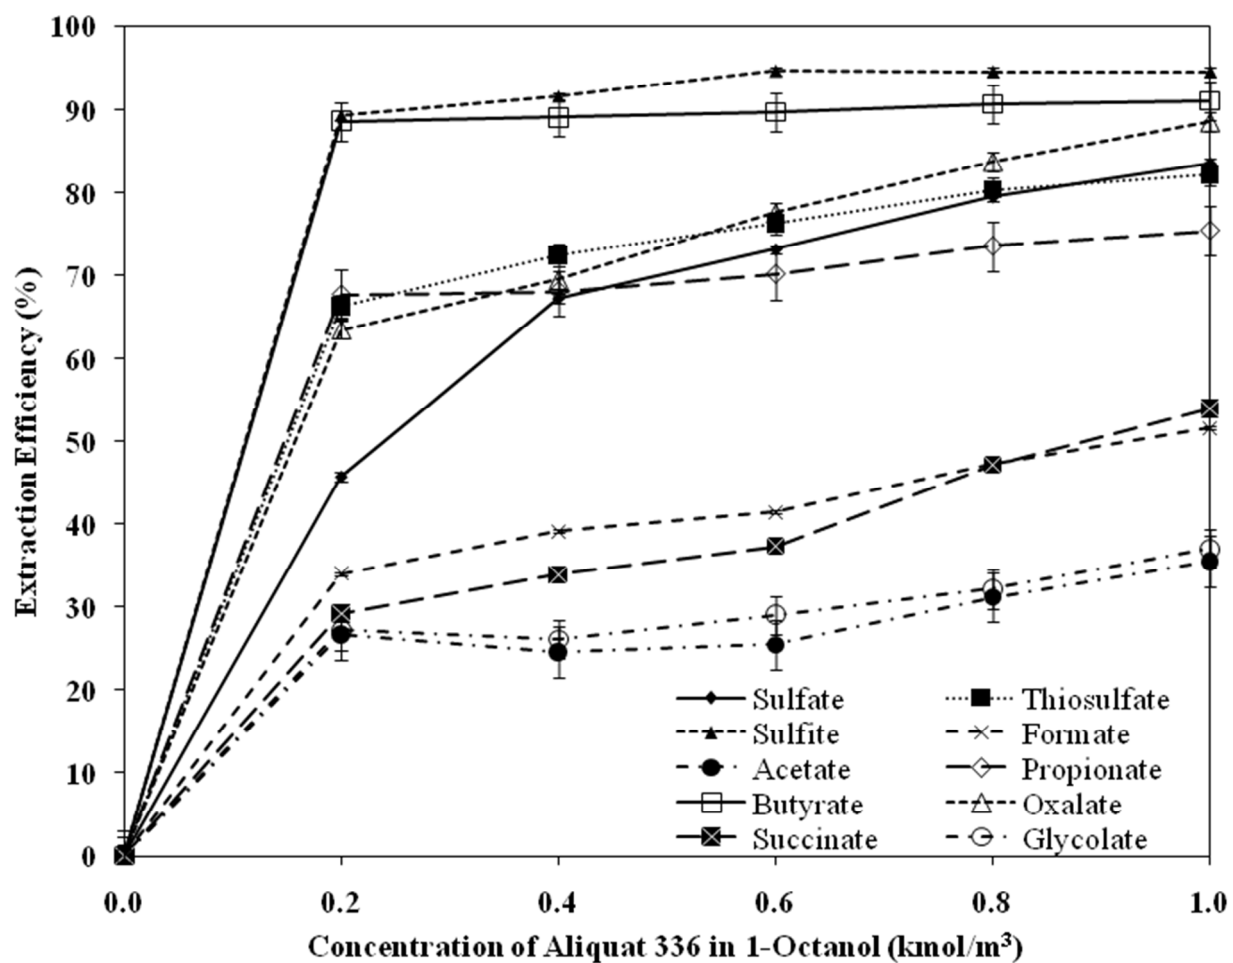

**Figure S2.** Effect of aliquat 336 concentration in 1-octanol on extraction of HSS in water  
(room temperature, 10 min mixing time, 1 to 1 phase ratio)

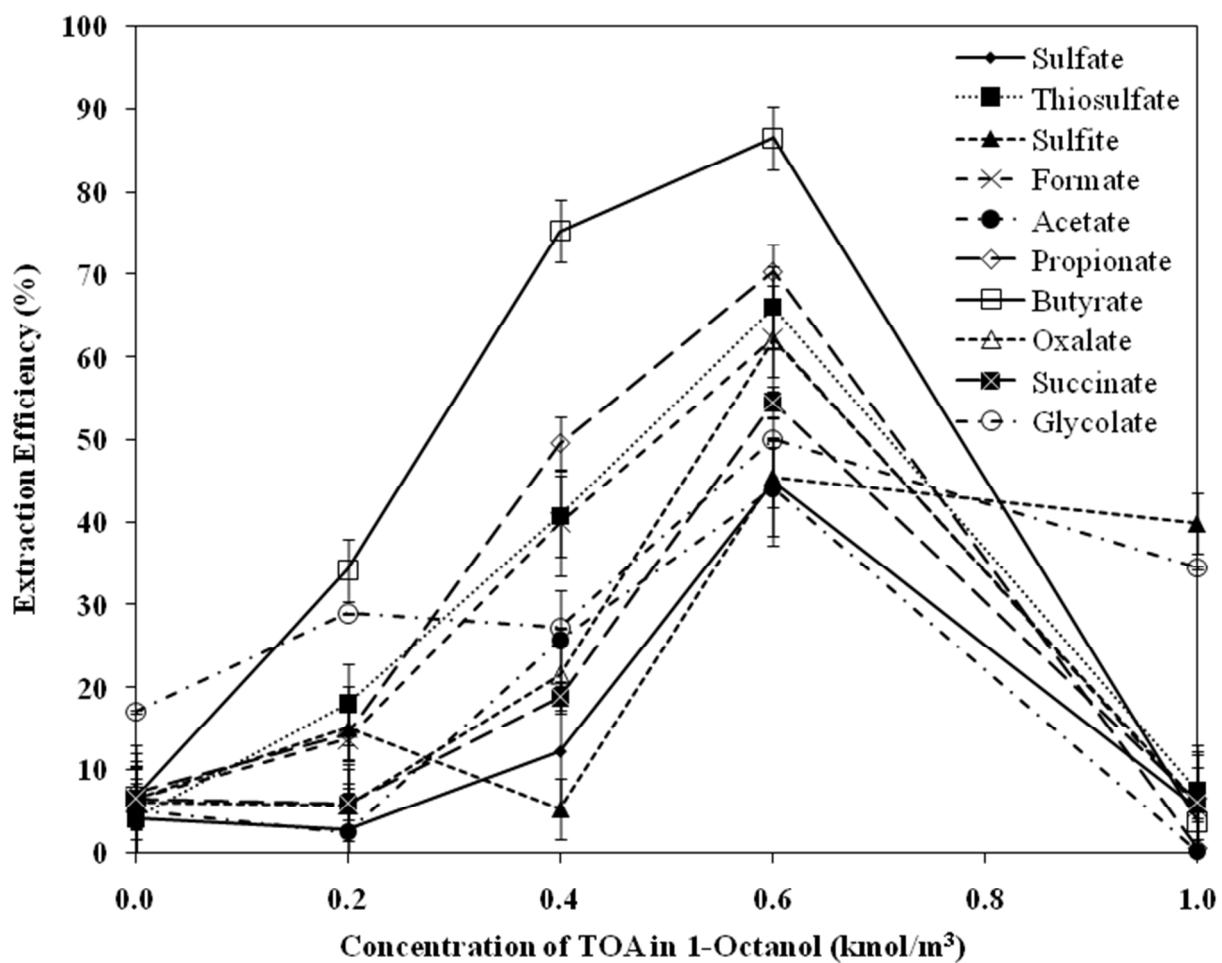

**Figure S3.** Effect of TOA concentration in 1-octanol on extraction of HSS in  $5 \text{ kmol/m}^3$  MEA (room temperature, 10 min mixing time, and 1 to 1 phase ratio)

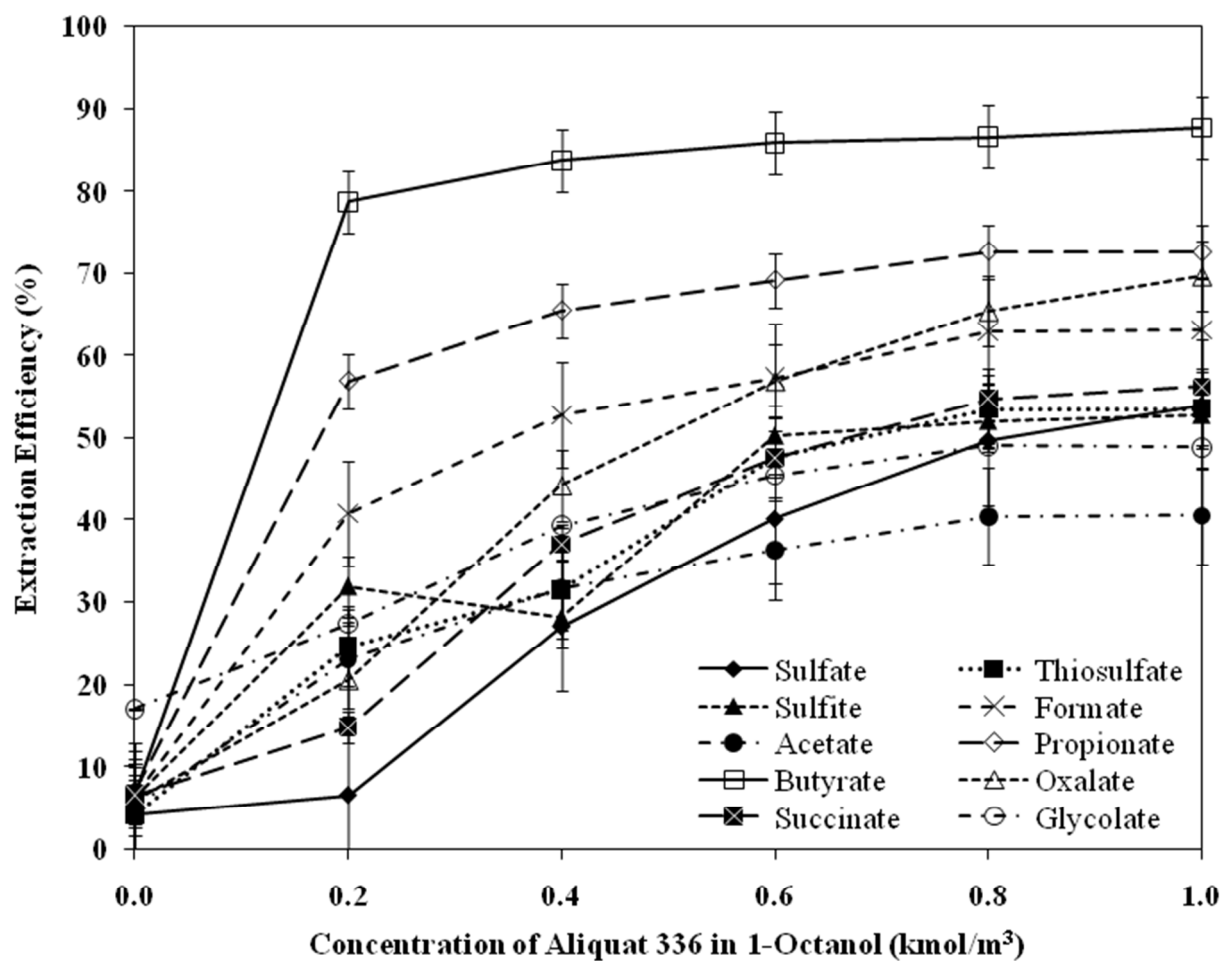

**Figure S4.** Effect of aliquat 336 concentration in 1-octanol on extraction efficiency of HSS in 5 kmol/m<sup>3</sup> MEA (room temperature, 10 min mixing time, 1 to 1 phase ratio)

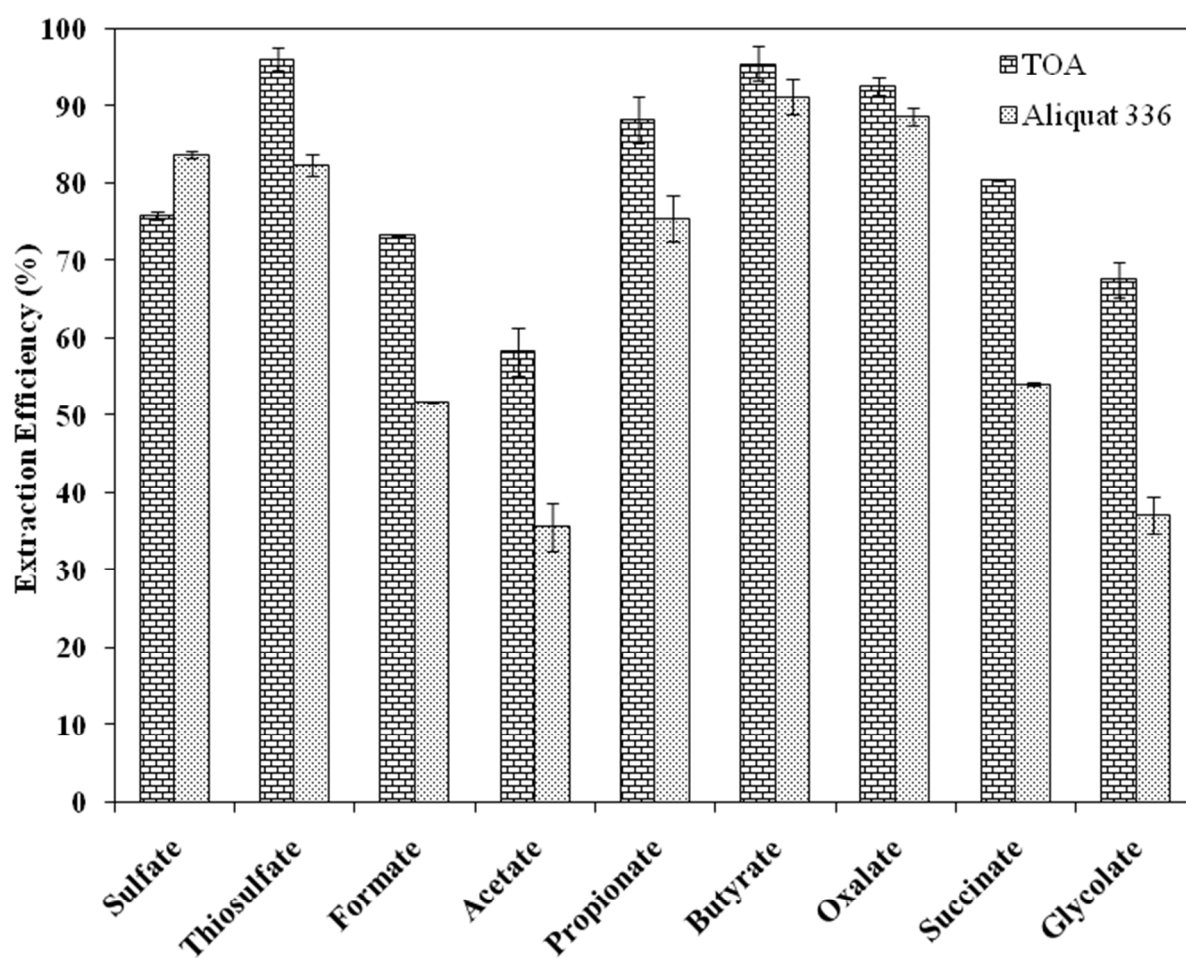

**Figure S5.** Comparison of  $0.6 \text{ kmol/m}^3$  TOA and  $1 \text{ kmol/m}^3$  aliquat 336 on extraction of HSS in water (room temperature, 10 min mixing time, and 1 to 1 phase ratio)

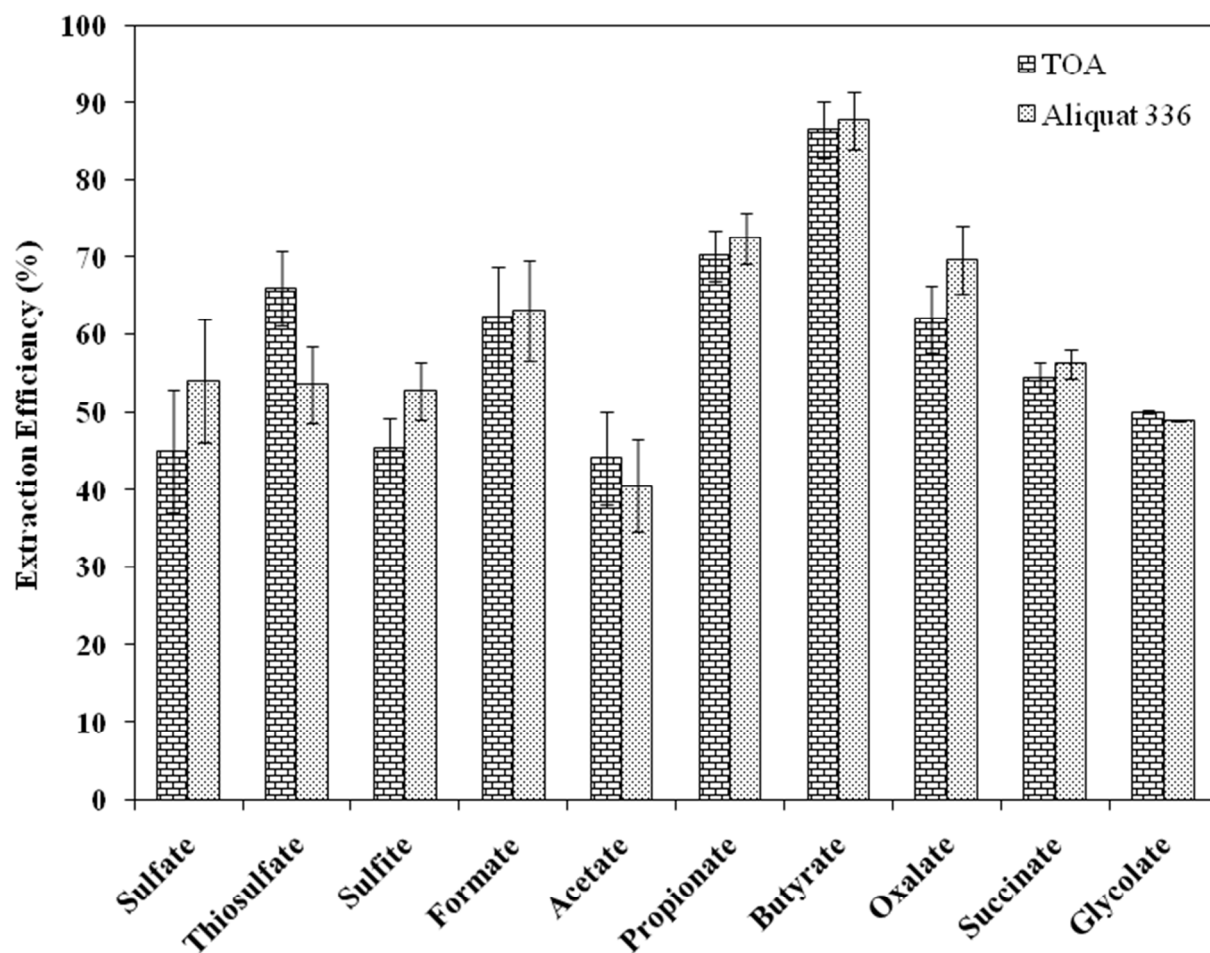

**Figure S6.** Comparison of  $0.6 \text{ kmol/m}^3$  TOA and  $1 \text{ kmol/m}^3$  aliquat 336 on extraction of HSS in  $5 \text{ kmol/m}^3$  MEA (room temperature, 10 min mixing time, and 1 to 1 phase ratio)

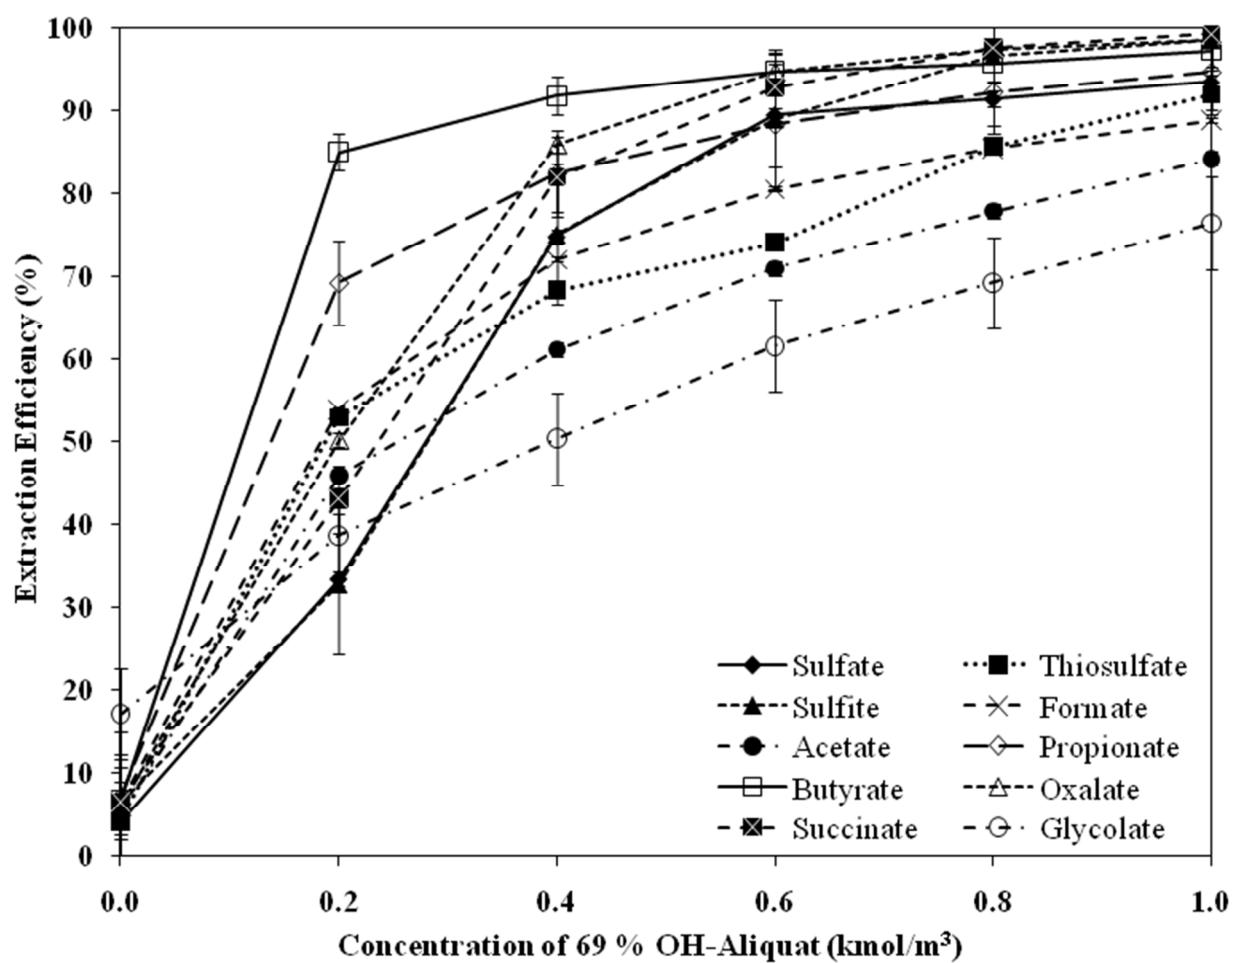

**Figure S7.** Effect of 69 % OH aliquot concentration on extraction of HSS in 5 kmol/m<sup>3</sup> MEA (room temperature, 10 min mixing ratio, and 1 to 1 phase ratio)



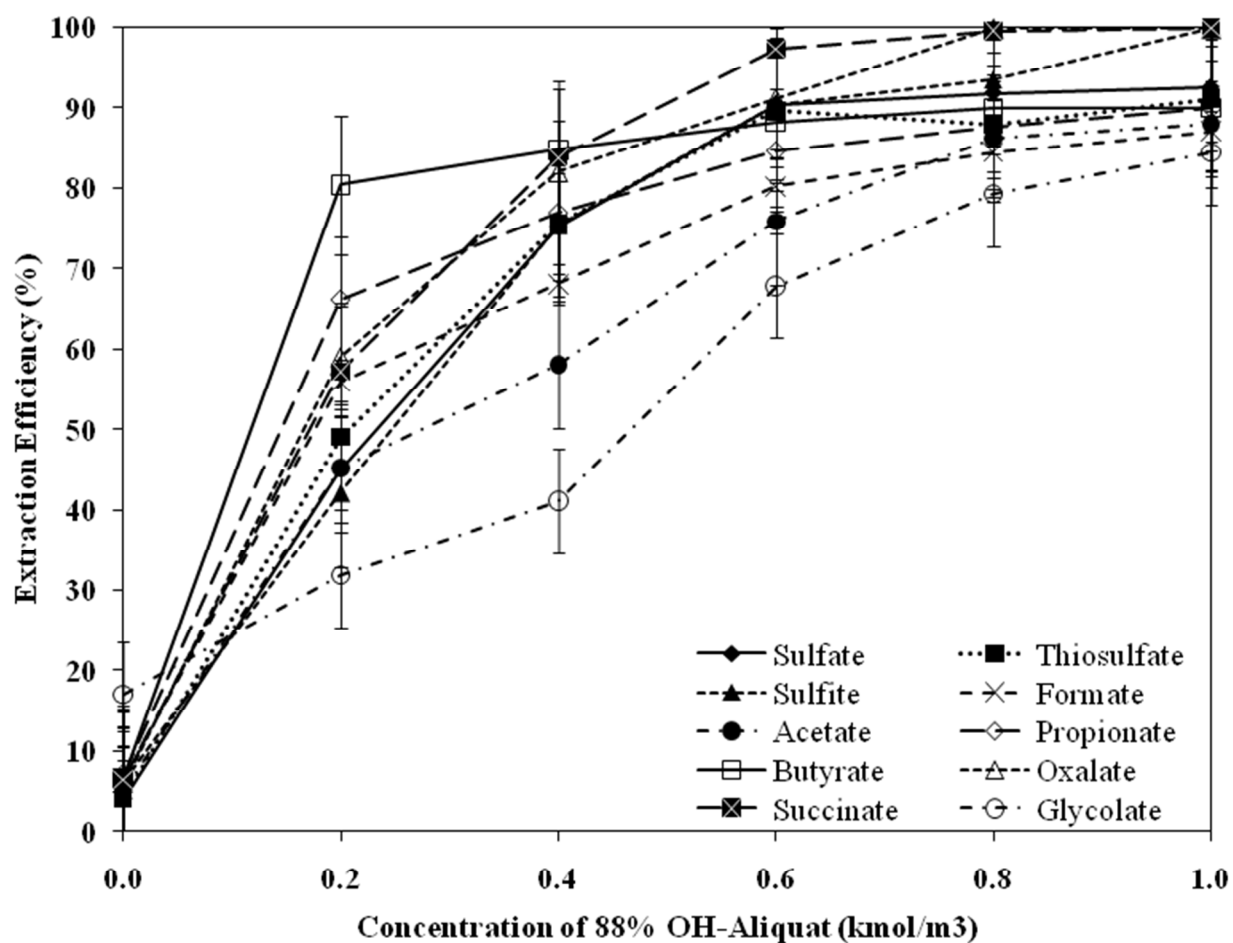

**Figure S8.** Effect of 88 % OH aliquot concentration on extraction of HSS in 5 kmol/m<sup>3</sup> MEA (room temperature, 10 min mixing time, and 1 to 1 phase ratio)

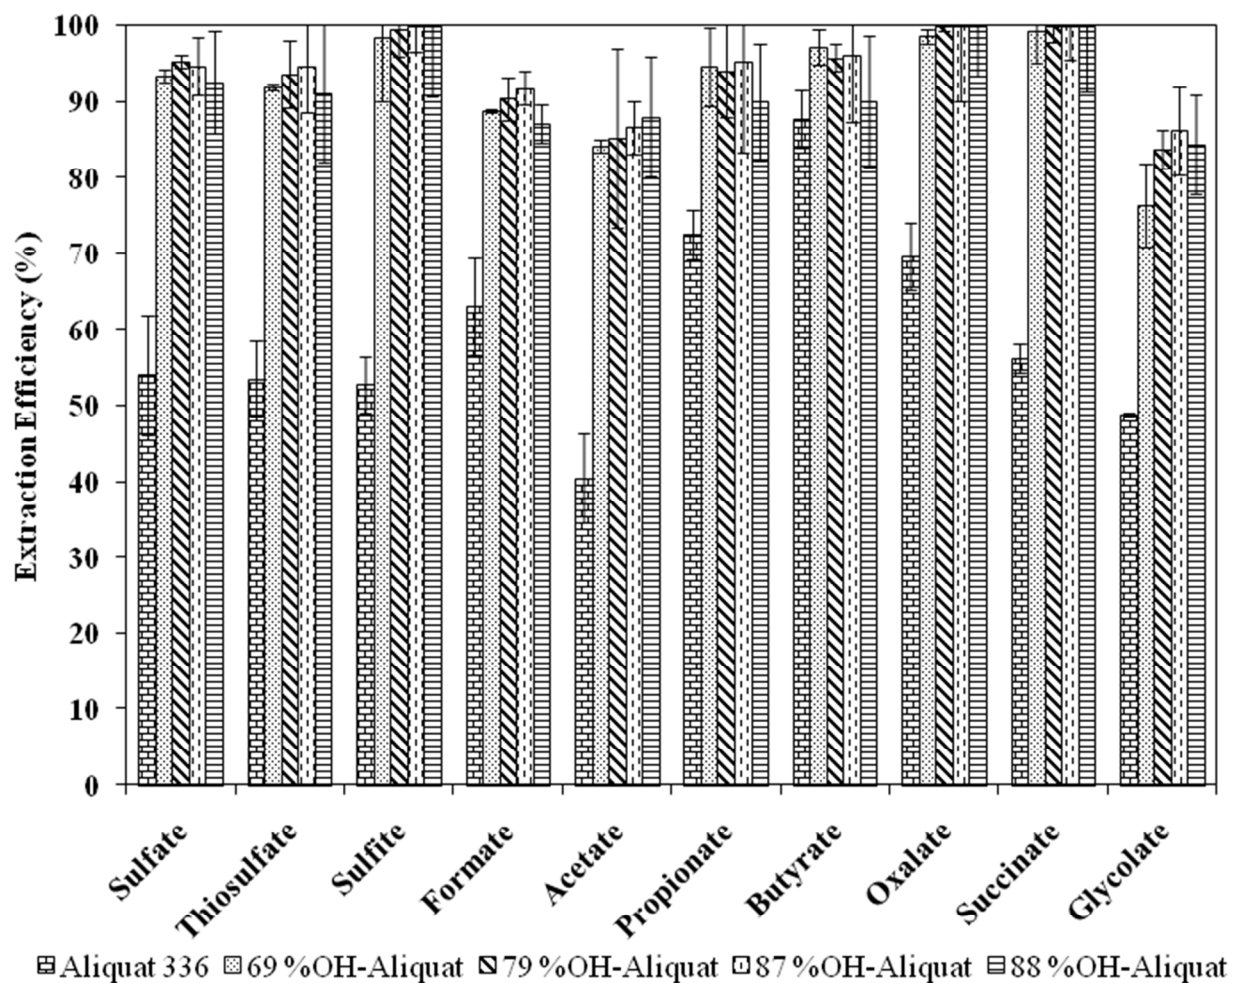

**Figure S9.** Effect of % OH in modified aliquat 336 on extraction of HSS in 5 kmol/m<sup>3</sup> MEA (1 kmol/m<sup>3</sup> modified aliquat, room temperature, 10 min mixing ratio, 1 to 1 phase ratio)

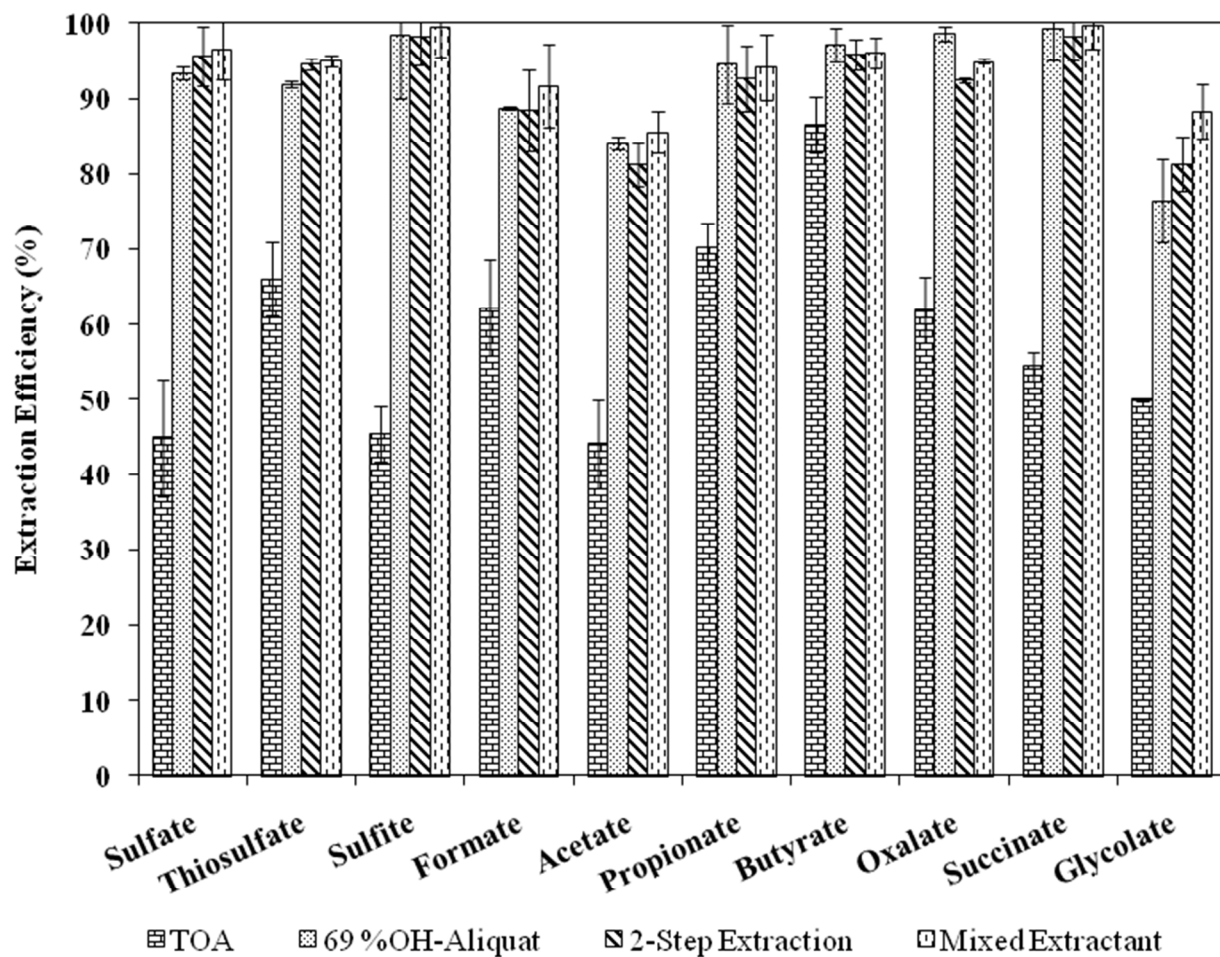

**Figure S10.** Comparison of HSS extraction in 5 kmol/m<sup>3</sup> MEA using 1 kmol/m<sup>3</sup> TOA, 0.6 kmol/m<sup>3</sup> 69 % OH aliquat, and their 2-step extraction and mixture (room temperature, 10 min mixing time, and 1 to 1 phase ratio)

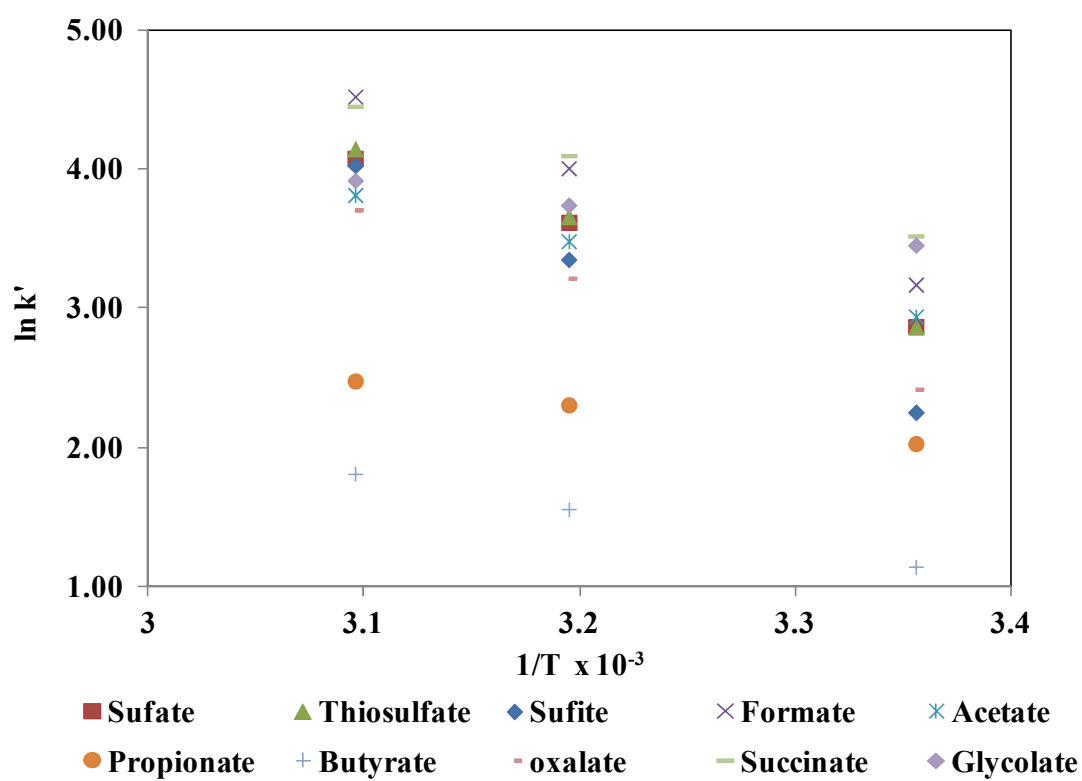

**Figure S11.** Arrhenius plot of HSS regeneration process  
(10 min mixing time, 1 to 2 phase ratio, and 4 kmol/m<sup>3</sup> NaOH)

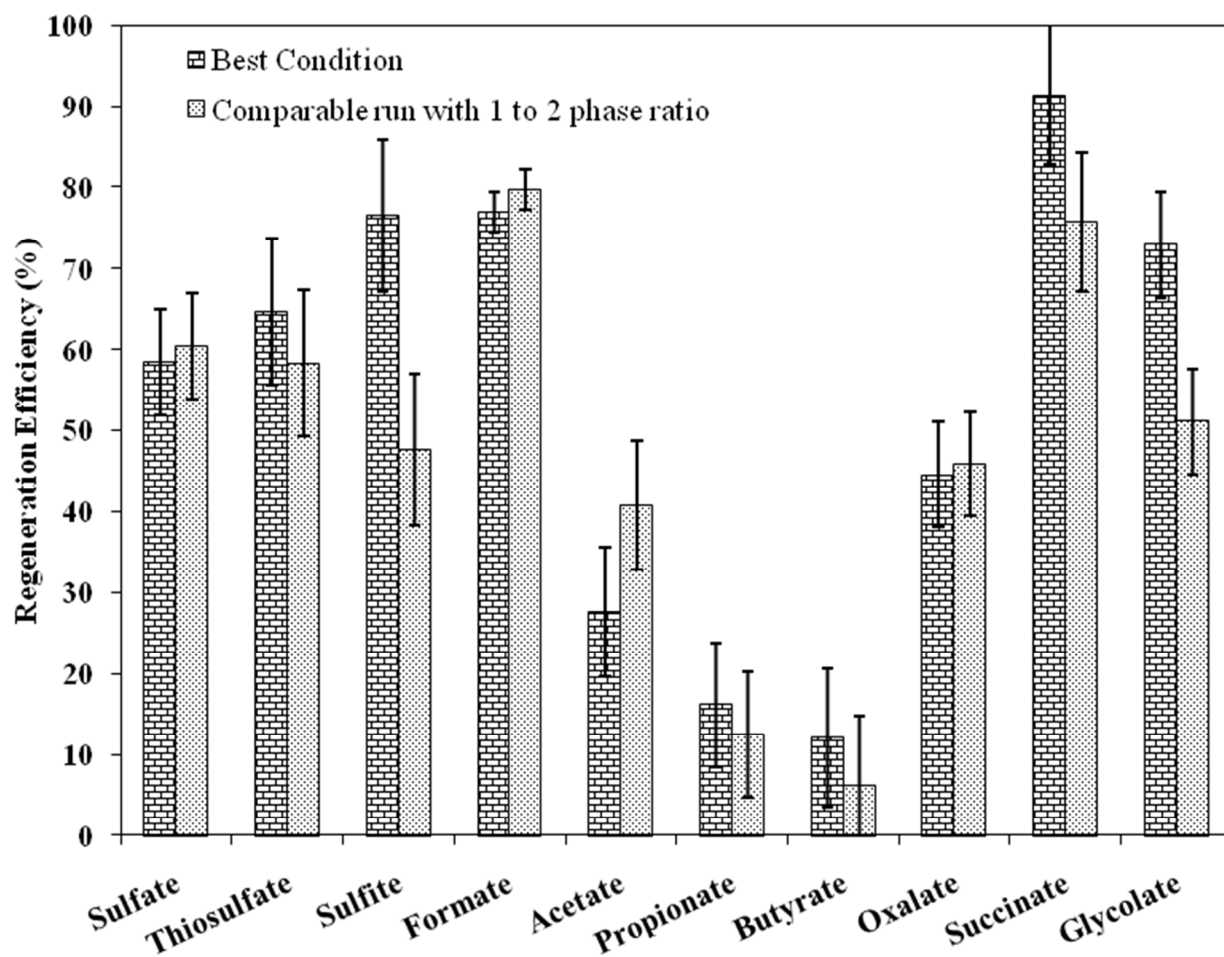

**Figure S12.** Comparison of regeneration efficiency using 1 to 1 and 1 to 2 phase ratio with respective 88 % and 69 % aliquot preloaded with HSS (323 K, 10 min mixing time, and 4 kmol/m<sup>3</sup> NaOH)

**Table S1.** Summary of extraction conditions

| Extraction Parameter      | Range                      |
|---------------------------|----------------------------|
| TOA concentration         | 0 – 1 kmol/m <sup>3</sup>  |
| Aliquat 336 concentration | 0 – 1 kmol/m <sup>3</sup>  |
| OH Aliquat concentration  | 1 kmol/m <sup>3</sup>      |
| Volume Phase Ratio        | 1 to 1, 1 to 2, and 2 to 1 |
| Temperature               | 298 – 338 K                |
| Mixing time               | 10 min                     |

**Table S2.** Summary of chemical modification condition of aliquat 336

| Chemical                   | Contact time | Volume<br>Phase ratio | Temperature<br>(K) | Mixing time<br>(min) | Degree of<br>OHConversion<br>(%, $\pm 2$ ) |
|----------------------------|--------------|-----------------------|--------------------|----------------------|--------------------------------------------|
| 2 kmol/m <sup>3</sup> KOH  | 10           | 1 to 1                | 298                | 5                    | 69                                         |
| 4 kmol/m <sup>3</sup> NaOH | 15           | 1 to 1                | 313                | 10                   | 79                                         |
| 5 kmol/m <sup>3</sup> NaOH | 15           | 1 to 2                | 333                | 10                   | 87                                         |
| 5 kmol/m <sup>3</sup> NaOH | 21           | 1 to 1                | 333                | 10                   | 88                                         |

**Table S3.** Langmuir correlation data of TOA and Aliquat extraction systems

| HSS                    | TOA     |          |                | Aliquat 336 |          |                |
|------------------------|---------|----------|----------------|-------------|----------|----------------|
|                        | a       | b        | R <sup>2</sup> | a           | b        | R <sup>2</sup> |
| Thiosulfate            | 0.00062 | -0.00947 | 0.62           | 0.00110     | -0.01106 | 0.98           |
| Sulfate                | 0.00227 | -0.00970 | 0.99           | 0.00176     | -0.01106 | 0.79           |
| Oxalate                | 0.00034 | -0.01039 | 0.85           | 0.00205     | -0.00091 | 0.96           |
| Formate                | 0.00353 | -0.00899 | 0.56           | 0.00470     | -0.01482 | 0.94           |
| Succinate              | 0.00207 | -0.00987 | 0.66           | 0.00780     | -0.01093 | 0.94           |
| Acetate                | 0.03948 | 0.03475  | 0.71           | 0.00817     | -0.02014 | 0.79           |
| Glycolate              | 0.01161 | 0.00222  | 0.54           | 0.00728     | -0.01998 | 0.87           |
| Propionate             | 0.00183 | -0.00874 | 0.51           | 0.00090     | -0.01239 | 0.91           |
| Butyrate               | 0.00038 | -0.00997 | 0.54           | 0.00015     | -0.01082 | 0.93           |
| Average R <sup>2</sup> | 0.67    |          |                | 0.91        |          |                |



**Table S4.** Summary of HSS preloaded 1 kmol/m<sup>3</sup> OH aliquat

| HSS         | Concentration (ppm) |             |             |             |
|-------------|---------------------|-------------|-------------|-------------|
|             | 69% OH Aliquat      | 79% Aliquat | 87% Aliquat | 88% Aliquat |
| Formate     | 877                 | 910         | 930         | 852         |
| Acetate     | 845                 | 771         | 920         | 825         |
| Propionate  | 880                 | 921         | 874         | 846         |
| Butyrate    | 938                 | 960         | 893         | 818         |
| Glycolate   | 808                 | 859         | 813         | 789         |
| Oxalate     | 995                 | 990         | 999         | 999         |
| Succinate   | 1032                | 1019        | 955         | 999         |
| Sulfate     | 924                 | 961         | 911         | 864         |
| Thiosulfate | 915                 | 895         | 889         | 830         |
